# Supplementary material
Source: publisher figshare collection journal article supplement (https://asha.figshare.com/ndownloader/files/16412393)
Supplement: Supplementary file 1 [file 16412393]

## Sheet: Android
Supplemental Material, Deshpande & Shimunova, "A Comprehensive Evaluation of Tinnitus Apps," AJA, https://doi.org/10.1044/2019_AJA-18-0135
Supplemental Material S2. List of tinnitus apps and associated features available on the Android mobile platform.
Name of the App	Name of the Developer	Free/Paid	Cost	Tinnitus Education, Awareness, and Prevention			Tinnitus Assessment and Measurement													Tinnitus Management
				Tinnitus information	Noise measurement	Hearing test	Pitch				Loudness			Laterality	Type	Timer	Annoyance	Questionnaire	Profile Save	Sound library										Sound library features																		Other features
							Primary	Secondary	Bandwidth	Modulation	Match	Balance	Modulation							Color noise/NBN	Natural/enviromental sounds	Mechanical sounds	Binaural beats	Physiological sounds	Puretones	Anti-phase sounds	Music	Notched stimuli	Breathing/relaxation exercises	Sound record/import	Sound export	Sound combination	Soundscape save	Volume control of individual sounds	Volume control	Volume balance	Pitch control	Pitch modulation	Amplitude modulation	Equalizer	Monaural/binaural presentation	Shuffle	Playlist	Loop playlist	Timer	Usage statistics	Alarm	Mininum masking level	Calibration
SoundBubble	plumbsoftware	Free																		Present	Present											Present			Present		Present								Present
A Soft Murmur	Gabriel Martin	Free																			Present											Present	Present												Present
Ambio - Sleep Sounds	verygoodapps.com	Free																		Present	Present	Present										Present			Present								Present				Present
Animal Sounds For Kids	Zodinplex	Free																			Present														Present
Animals Sounds Ringtones Alarm	remind4u2	Free																			Present
ASMR Sounds For Sleeping	Sleep Sound ASMR LLC	Free																		Present	Present	Present										Present													Present
AudioNoise	ARTESON	Free																		Present
Bed Time Fan White Noise Sound	ellisapps Inc.	Free																		Present															Present										Present
Bedtime Sleeping Fan White Noise	VICTO IDEAS Health & Fitness Lab	Free																				Present																							Present
Beltone Tinnitus Calmer	Beltone	Free		Present																Present	Present						Present		Present	Present		Present	Present		Present	Present									Present	Present
Best Android Symptom Checker	Senstore - Powered by Harvard Medical School	Free		Present
Birds Sounds Relax and Sleep	Zodinplex	Free																			Present														Present										Present
Birds Sounds-Relax,Sleep Calm	Fitness Sounds	Free																			Present														Present										Present
Brain Noise	Rohn Media GmbH	Free																		Present															Present
Brainwave Studio : EEG Gen	Dalcoms	Free																		Present			Present												Present										Present
Brainwave Tuner Lite	IMOBLIFE INC.	Free																		Present			Present												Present
Chill Pill Hypnosis Session	The Happy Apps Company Ltd	Free																											Present
Chroma Doze (white noise)	Paul Marks	Free																		Present													Present		Present		Present			Present
COLORED NOISER	a22	Free																		Present															Present				Present						Present
Concentration	Faiz Ayush	Free																		Present
Crickets	Droiddd.com	Free																			Present														Present
Curing Tinnitus	Villeapps	Free
Digital Trips: Sleep	Michael Powroznik	Free																		Present
Dolphin Sound-Relax Sleep Calm	Fitness Sounds	Free																			Present						Present																		Present
Dream Sounds Free	Chonk Limited	Free																		Present	Present	Present													Present										Present
Forest Sounds-Relax Sleep Calm	Fitness Sounds	Free																			Present														Present										Present
Guitar Tinnitus Tone Generator	Saatvik	Free					Present
H & T Sound Therapy	Ileisou	Free																		Present															Present					Present					Present
Home Remedies - Natural Cure	Pacific P. Regmi	Free
Home Remedy Natural Treatment	Sirseni Apps	Free		Present
How to - Tinnitus?	Apps For People	Free
Lightning Bug - Sleep Clock	lightningbug.me	Free																			Present						Present																		Present		Present
Link Tinnitus Sound	Oticon A/S	Free		Present																Present	Present								Present	Present
Lullabies Relax & Sleep Baby	Zodinplex	Free																									Present								Present										Present
Lullabies Sounds-Relax Calm	Fitness Sounds	Free																									Present								Present										Present
Lullaby for baby	Zodinplex	Free																									Present								Present										Present
Lullaby Pony Sleep	Baby Games Sleep Animal Sounds Pony	Free																									Present
Mood Rain	JMD Mobile Dev Studios	Free																			Present														Present										Present
Mountain Sounds-Relax Calm	Fitness Sounds	Free																			Present						Present								Present										Present
Mr.Sleep-Better	Cooervo Labs	Free																			Present			Present								Present			Present										Present
My Fan	Blinkin Studios	Free																			Present	Present
Nature Sounds	Relaxio	Free																			Present						Present					Present			Present										Present
Nature Sounds	Dream_Studio	Free																			Present														Present										Present
Nature Sounds Free	Wolftown Studios	Free																			Present																								Present
Nature sounds relax & sleep	Desenvemax	Free																			Present														Present										Present
Nature Sounds Relax and Sleep	Zodinplex	Free																			Present						Present								Present										Present
Nature Sounds Relax And Sleep	Ape X Apps 333	Free																			Present						Present
Nature sounds to sleep to	buzjabuzja	Free																			Present
Nature Sounds, Sleep & Relax	ZenApps	Free																			Present											Present	Present		Present										Present
Night Sounds-Calm Relax Sleep	Fitness Sounds	Free																			Present																								Present
NOISE	PRAKSTO	Free																		Present															Present										Present
Noise Generator for Tinnitus	Zodinplex	Free																		Present															Present										Present
Noise Machine	Synopsia	Free																		Present																								Present	Present
Noise Meter	JINASYS	Free			Present
Ocean Sounds Relax n Sleep	Zodinplex	Free																			Present														Present										Present
Professional Tone Generator	José Morais	Free																					Present		Present	Present						Present			Present	Present			Present		Present		Present
Rain Music	Avryx	Free																			Present									Present		Present	Present										Present	Present	Present
Rain Sounds - Sleep & Relax	Relaxio	Free																			Present											Present			Present										Present
Rain Sounds - Sleep Ambiance	Loopray	Free																			Present											Present			Present										Present		Present
Rain Sounds HD	Deux	Free																			Present																								Present
Rain Sounds Relax & Sleep	Zodinplex	Free																			Present														Present										Present
Rain Sounds Relaxation Music	Cuteness Inc.	Free																			Present						Present																		Present
Rain Sounds-Relax Sleep Calm	Fitness Sounds	Free																			Present														Present										Present
Relax & Sleep Well Hypnosis	Diviniti Publishing Ltd	Free																											Present
Relax and Sleep	DSKWRK	Free																		Present	Present	Present		Present			Present					Present	Present		Present										Present
Relax Country ~ Nature Sounds	mikdroid	Free																			Present														Present										Present
Relax Forest ~ Nature Sounds	mikdroid	Free																			Present														Present										Present
Relax Meditation Sounds	buzjabuzja	Free																			Present						Present
Relax Meditation: Sleep Sounds	Ipnos Software	Free																			Present						Present					Present			Present									Present	Present
Relax Mountain ~ Nature Sounds	mikdroid	Free																			Present						Present								Present										Present
Relax Night ~ Nature Sounds	mikdroid	Free																			Present						Present								Present										Present
Relax Noise 3 - Tinnitus Mask	Martin Nathansen	Free																		Present															Present										Present
Relax Rain ~ Rain Sounds	mikdroid	Free																			Present														Present										Present
Relaxation Sounds	Avryx	Free																			Present	Present					Present																		Present
Relaxing Christmas Sounds	Fitness Sounds	Free																									Present																		Present
Relaxing Dolphin Sounds	Fitness Sounds	Free																			Present																								Present
Relaxing Mountain Sounds	Fitness Sounds	Free																			Present																								Present
Relaxing Night ~ Sleep Sounds	[ ninja tech ]	Free																			Present	Present					Present					Present													Present
Relaxing Piano Sounds	Fitness Sounds	Free																									Present																		Present
Relaxing Sea Sounds-Calm Sleep	Fitness Sounds	Free																			Present																								Present
Relaxing Sounds	Loopray	Free																			Present														Present
Relaxing Whale Sounds	Fitness Sounds	Free																			Present																								Present
ReSound Relief	GN Resound	Free		Present																Present	Present						Present		Present	Present		Present	Present		Present	Present									Present	Present
River Sounds-Relax Sleep Calm	Fitness Sounds	Free																			Present														Present										Present
Running Shower Sound	Applause Appsss	Free																			Present
SDS Nature Sounds	Sleepdroid Studios	Free																			Present														Present										Present
SDS Rain Sounds	Sleepdroid Studios	Free																			Present																								Present
SDS Tinnitus Relief	Sleepdroid Studios	Free																		Present	Present	Present													Present										Present
Sea Sounds-Relax Sleep Calm	Fitness Sounds	Free																			Present														Present										Present
Seaside Sound-Relax Sleep Calm	Fitness Sounds	Free																			Present														Present										Present
Sleep Ambience	JAZBOMB	Free																			Present	Present					Present			Present		Present	Present		Present										Present		Present
Sleep And Noise Sounds (SNS)	Deux	Free																		Present	Present	Present		Present																					Present
Sleep Bug: Sound Generator	Panzertax	Free																		Present	Present	Present					Present					Present			Present										Present
Sound App free - Nature Sounds	inSentis	Free																		Present	Present
Sound Meter	Smart Tools co.	Free			Present
Sound Meter - Decibel	melon soft	Free			Present
SoundBubble (free)	plumbsoftware	Free																		Present	Present											Present			Present		Present								Present
Sounds for Baby Sleep Music	Zodinplex	Free																									Present																		Present
Sounds of Birds Ringtones	remind4u2	Free																			Present																								Present
Sounds of Nature. Relax music	remind4u2	Free																			Present																								Present
Sounds of Ocean Rest and Relax	remind4u2	Free																			Present																								Present
Sounds of rain and thunder	Federico Paolinelli	Free																			Present																								Present
Sounds Of Rain Relax your Mind	remind4u2	Free																			Present																								Present
Starkey Relax	Starkey Hearing Technologies	Free		Present																Present	Present	Present					Present								Present		Present	Present	Present						Present
Stop Ringing in My Ears	Ambidextrous	Free
StopTinnitus	Raise Awareness LLC	Free					Present				Present
TaoMix - Focus, sleep, relax	inookta studio inc.	Free																		Present	Present			Present			Present			Present		Present	Present		Present										Present
Television White Noise FREE	Kevin Hinds	Free																		Present	Present	Present					Present																		Present
Thunder sound-Relax Sleep Calm	Fitness Sounds	Free																			Present														Present										Present
Thunder Sounds Sleep Sounds	Zodinplex	Free																			Present														Present										Present
Thunderstorm Sounds Nature	Zodinplex	Free																			Present														Present										Present
Tinnitus	John Goodstadt	Free		Present																Present															Present											Present
Tinnitus Balance	Phonak	Free		Present																Present	Present						Present			Present														Present	Present	Present
Tinnitus Notch	Kraken Labs	Free																										Present
Tinnitus Peace	hw94	Free																									Present								Present						Present				Present
Tinnitus relief	Sundelin Applications	Free
Tinnitus Relief	NYSapps	Free																		Present
Tinnitus Remedies	Santor Gioni	Free
Tinnitus Retraining Therapy	oknow lab	Free
Tinnitus Sleeping Aid	Mordy Geist	Free																		Present					Present										Present										Present
Tinnitus Sound	Oticon A/S	Free		Present																Present	Present								Present	Present
Tinnitus Symptoms + Treatment	Text Examples	Free		Present
Tinnitus Therapy Lite	Sound Oasis	Free		Present																Present	Present	Present													Present										Present
Tonal Tinnitus Therapy	appyhapps.nl	Free					Present				Present	Present													Present										Present		Present
Track Your Tinnitus	Winfried Schlee	Free			Present													Present
Ultimate Hypnosis by G.H.	Diviniti Publishing Ltd	Free																											Present
Vacuum Cleaner Sound	Applause Appsss	Free																				Present
Volume Limiter	VRZ	Free			Present
Washing Machine Sound	Applause Appsss	Free																				Present
Water & Gong ~ Relaxing Sounds	mikdroid	Free																			Present						Present								Present										Present
Waterfall Sounds Nature Sounds	Zodinplex	Free																			Present														Present										Present
White Noise Baby	TMSOFT	Free																			Present	Present		Present			Present			Present					Present										Present
White Noise Baby Sleep Sounds	AMICOOLSOFT	Free																		Present	Present	Present		Present			Present								Present										Present
White Noise Calm Sounds	IslandBoy Software	Free																		Present	Present						Present								Present										Present
White Noise Free	TMSOFT	Free																		Present	Present	Present		Present			Present			Present		Present	Present		Present	Present	Present						Present	Present	Present		Present
White Noise Generator	Relaxio	Free																		Present	Present	Present										Present	Present		Present										Present
White Noise Pro	coolsharp	Free																		Present	Present						Present					Present			Present	Present									Present
White noise relax music	Potencialmente interesante	Free																		Present	Present																								Present
White Noise Sleep Well Sounds	Bitron Games	Free																		Present	Present	Present																							Present
White Noise Sound Machine	Purple Buttons LLC	Free																		Present	Present	Present
White Noise Sounds - Free	Best Free Apps!!	Free																		Present	Present														Present										Present
Wind Sounds Nature Sounds	Zodinplex	Free																			Present														Present										Present
myNoise	myNoise BVBA	Free																		Present	Present		Present				Present													Present					Present
nature sounds ringtones	remind4u2	Free																			Present																										Present
white noise simple	issamsaleem	Free																			Present						Present
relax ocean~nature sounds	mkdroid	Free																			Present						Present					Present			Present										Present
Bedtime sleeping fan sound	appsavvy	Free																				Present																							Present
white noise sleeping sound	mikdroid	Free																		Present	Present	Present													Present										Present
night nature sound	nighterryda	Free																			Present						Present
Vitamin duide 16~ healing	fas F	Free
rain piano sound	fitness sound	Free																			Present						Present																		Present
whist-sleepsounddesigner(free)	Sensimetrics	Free																			Present														Present		Present		Present
nature sounds - relax sleep calm	fitness sound	Free																			Present														Present										Present
Wind sounds-relax sleep calm	fitness sound	Free																			Present						Present								Present										Present
instrumental relax music	bitagroup	Free																			Present						Present
white noise:sleep	M.T.Player	Free																			Present						Present					Present	Present		Present										Present
Atmosphere:Relaxing Sounds	peak Pocket Studio	Free																		Present	Present	Present	Present				Present			Present					Present										Present
Sleep Pillow: Sleep Sounds	fitness22	Free																			Present											Present	Present		Present										Present
Relax Melodies: Sleep Sounds	Ipnos Software	Free																		Present	Present	Present					Present		Present			Present	Present		Present										Present
ambience nature sounds	mikdroid	Free																			Present	Present					Present					Present			Present										Present
Nature Sounds	Elfiz Media	Free																			Present														Present
noise generator	TMSOFT	Free																		Present																	Present
White noise relax meditation	BoxTimer365	Free																			Present	Present					Present					Present			Present										Present
ToneGen Tone Generator Free	NCH Software	Free					Present			Present	Present				Present					Present					Present
Rain Sounds Rain	Bluesoo	Free																			Present														Present										Present
Piano Songs to Sleep	Desenvemax	Free																			Present						Present								Present										Present
Shhh…Sleep in Seconds	Investov	Free																		Present
Dolphins songs to sleep	Desenvemax	Free																			Present						Present																		Present
White Noise: Sleep Sounds & Relax	AwesomeDroid Studio	Free																		Present	Present	Present					Present					Present	Present	Present								Present			Present
Sleep	Blake Haas	Free																		Present	Present	Present										Present													Present
Frequency Generator	Hoel Boedec	Free					Present
Sleep Aid Fan- White Noise Fan Sounds	App Magna	Free																		Present															Present										Present
Brown Noise	Infinite_Apps	Free																		Present															Present
Note Calculator & Tuning Fork	Siliconfish	Free					Present
White Noise Generator	Hipxel	Free																		Present
IntelliSound Pillow	AuralCare Hearing Centers of America	Free																		Present	Present						Present								Present										Present		Present
Signal Generator	RadonSoft	Free																		Present					Present										Present		Present
Noise Wall Block Noise	MynioTech Apps	Free																		Present												Present		Present	Present										Present
Sleeping Fan Sounds	DaniPaniApps	Free																				Present
Pink Noise	wellbeing	Free																		Present																									Present
Sea Sounds- Ocean Sounds	Miniclues Entertainment	Free																			Present														Present										Present
Sleep Sounds	Relaxio	Free																			Present	Present										Present		Present	Present										Present
Sleepo:Relaxing sounds, sleep	Relaxio	Free																		Present	Present	Present					Present					Present		Present	Present										Present
Relaxing Rain & Thunder Sounds	Million Mile Technologies	Free																			Present						Present					Present		Present											Present
Sleeping Garden: Sounds of nature for relaxation.	Symphonic Garden LLC	Free																			Present											Present													Present
Good Night- Rainy, White Noise	Paper Airplane Dev Team	Free																		Present	Present																								Present
Rain Sounds- Relax Rain	FIRE MOBILE	Free																			Present																								Present
Sleep Beats: Binaural Beat Generator and Brainwave	SMB Studio	Free																					Present													Present									Present
White Noise Sounds- Sleep Sounds	Global Inc	Free																			Present	Present					Present					Present	Present	Present	Present										Present
White Noise- calm, concentrate	studioNMD	Free																		Present	Present	Present										Present	Present	Present											Present
Sounds: Relax and Sleep	Apps Lifestyle and Beauty	Free																			Present						Present
How to Stop Ear Ringing	Matthew Merdock	Free		Present
White Noise Sleep Fan Sounds	HictorLab	Free																		Present															Present										Present
Hairdryer ASMR	Sound Apps	Free																				Present
Sleep Aid	WasilukApps	Free																		Present										Present					Present										Present
Relaxing Mountain Melodies	Million Mile Technologies	Free																			Present						Present					Present
Relaxing Nature Sounds	mistic.app	Free																			Present						Present															Present		Present
Relax Sounds	Lovatto Studio	Free																			Present						Present					Present		Present	Present	Present									Present
White Noise	Sound Apps	Free																		Present
White Noise Lite	Vision Board Movies	Free																		Present															Present										Present
Sleep Fan Sounds White Noise	HictorLab	Free																		Present															Present										Present
X-Noise	NJDSoft	Free																		Present															Present										Present
Sleep Orbit: Relaxing 3D Sounds, White Noise & Fan	SMB Studio	Free																		Present	Present	Present	Present	Present			Present					Present	Present	Present		Present									Present
Sleep like a Baby	SecretBox	Free																		Present	Present	Present		Present			Present																		Present
Tinnitus Tuner	narusat	Free																		Present	Present				Present							Present				Present	Present				Present
Tinnitus TwinPlayer	issamsaleem	Free		Present			Present	Present			Present			Present	Present	Present
Relaxing Airconditioner Sound	Applause Appsss	Free																				Present
White Noise	AAUK	Free																		Present	Present	Present										Present		Present											Present
Tinnitus Symptoms Treatment	GoodHealth Ltd	Free		Present
Tinnitus	Henry Hoff	Free		Present
AudioNotch	AudioNotch	Free		Present			Present				Present				Present													Present
Tinnitus	NABIOM SOFT	Free		Present
Tinnitus ACRN	issamsaleem	Free					Present				Present														Present
Tinnitus Describer	issamsaleem	Free					Present	Present			Present			Present
SleepSet - Sleep Consultant	Ticket to ride Corp.	Paid	0.99																		Present	Present	Present	Present			Present					Present													Present		Present
Sound App - Nature Sounds	inSentis	Paid	0.99																	Present	Present
Tinytus	Adrien GIRARD	Paid	0.99																	Present															Present	Present			Present
White Noise	TMSOFT	Paid	0.99																	Present	Present	Present		Present			Present			Present		Present	Present		Present	Present	Present					Present	Present	Present	Present		Present
SimplyNoise	Reactor	Paid	0.99																	Present															Present				Present						Present
Tinnitus Hyperacusis Pro	Jined	Paid	0.99																	Present
Dream Sounds	Chonk Limited	Paid	1.08																	Present	Present	Present					Present								Present										Present
NOISE Plus	PRAKSTO	Paid	1.6																	Present															Present										Present
Whist - Tinnitus Relief	Sensimetrics Corporation	Paid	1.99	Present			Present				Present	Present		Present	Present					Present					Present										Present	Present	Present								Present
Noisli	Noisli Ltd	Paid	1.99																	Present	Present	Present										Present													Present
Audiometric SLOT	Team kenken31.jp	Paid	2
Stop Tinnitus! Hypnosis	Kim Fleckenstein	Paid	2.47																										Present
Tinnitus Relief	Develant Technologies AB	Paid	2.49	Present																									Present
Relax Melodies P: Sleep Sounds	Ipnos Software	Paid	2.99																	Present	Present	Present	Present	Present			Present		Present			Present	Present	Present	Present									Present	Present
Sleep Sounds -Deluxe Edition	Sleepdroid Studios	Paid	2.99																	Present	Present	Present					Present
White Noise Pro	TMSOFT	Paid	2.99																	Present	Present	Present		Present			Present			Present		Present	Present		Present	Present	Present					Present	Present	Present	Present		Present
Overcome Tinnitus Hypnotherapy	Diviniti Publishing Ltd	Paid	4.7
Tinnitus Mono	oknow lab	Paid	4.75				Present				Present			Present
Tinnitus Cure: The Easy Way	The Optimate	Paid	4.97
COLORED NOISER Pro	a22	Paid	5																	Present																			Present						Present
Tinnitus Therapy Pro	Sound Oasis	Paid	5.99																	Present	Present	Present													Present					Present					Present
StopTinnitus Pro	Raise Awareness LLC	Paid	8.99				Present				Present
Tinnitus Help	IND-Ingenieurbuero f. Nachrichten- u. Datentechnik	Paid	9.22				Present				Present		Present	Present					Present		Present				Present		Present								Present	Present		Present	Present		Present				Present
Tinnitus Stereo	oknow lab	Paid	9.5				Present				Present			Present
tinnitus trainer	Essential Software Design	Paid	3.49
PerNitus	WonderUX	Paid	2.39																	Present															Present
Rainy Mood	Plain Theory	Paid	2.99																		Present											Present		Present
Whist-tinnitus relief	Sensimetrics	Paid	1.99	Present			Present				Present	Present		Present	Present					Present					Present										Present	Present	Present								Present
White Noise Sound Machine Pro	Purple Buttons LLC	Paid	1.99																	Present	Present	Present
White Noise Soundscapes	Jeremy Raines	Paid	0.99																	Present	Present											Present							Present						Present
White Noise Sleep Sounds App	M.T. Player	Paid	0.99																		Present						Present			Present		Present	Present	Present											Present
SleepSet: 100 sleep sounds	Ticket to ride Corp.	Paid	0.99																		Present	Present	Present	Present			Present							Present											Present		Present
Nature Sounds Relax Sleep Pro	Zodinplex	Paid	0.99																		Present						Present								Present										Present
Tinnitus ACRN Application	issamsaleem	Paid	3.49				Present				Present														Present
[truncated: 1 more columns]
